# Supplementary material for: The Effect of Complete Integration of HIV and TB Services on Time to Initiation of Antiretroviral Therapy: A Before-After Study
Source: PubMed Central journal article supplement (PMC3465310; doi:10.1371/journal.pone.0046988), 2012-10-05

DAG 1

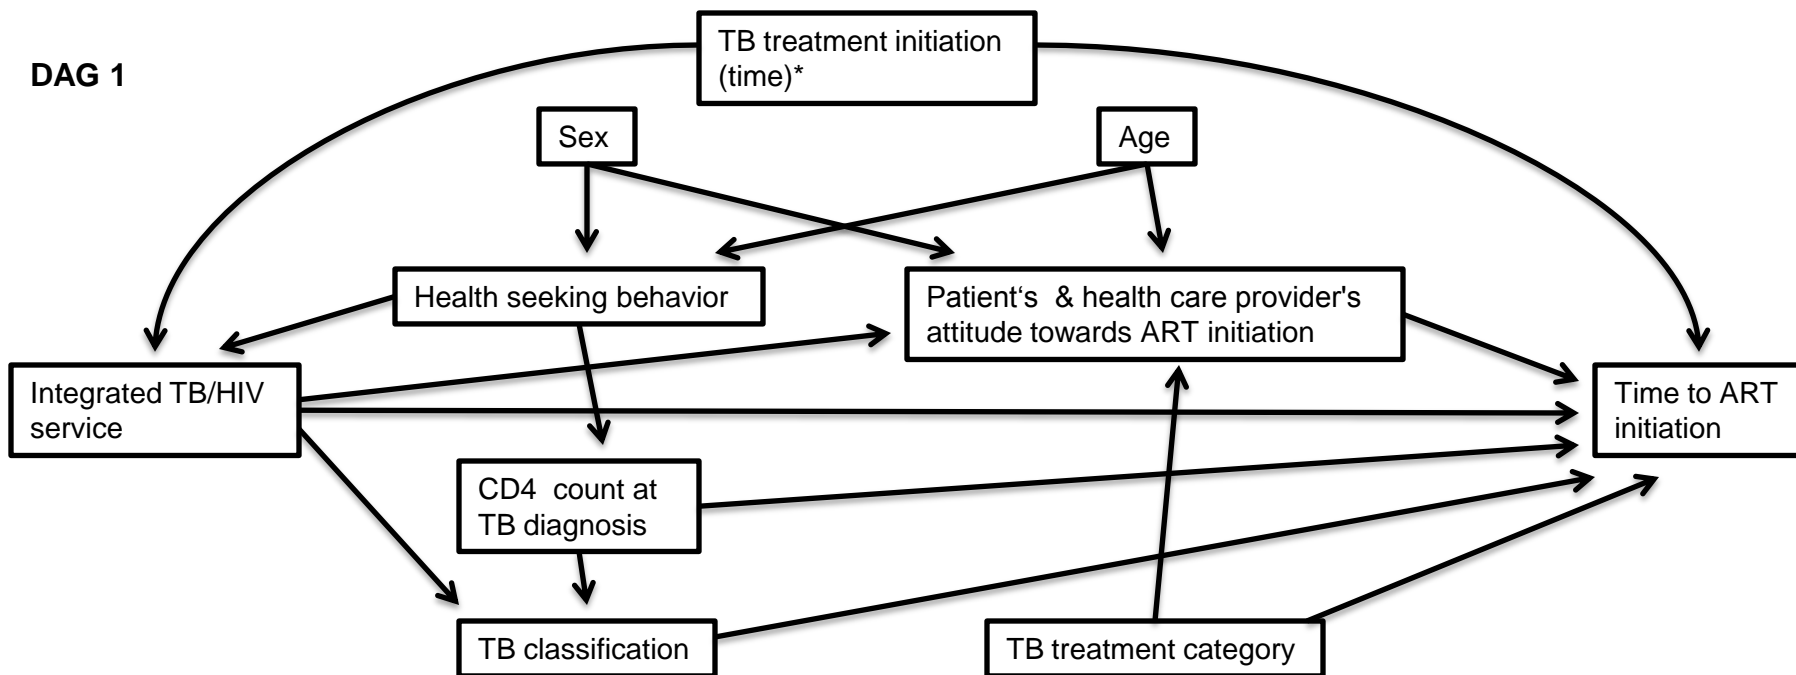

DAG 2

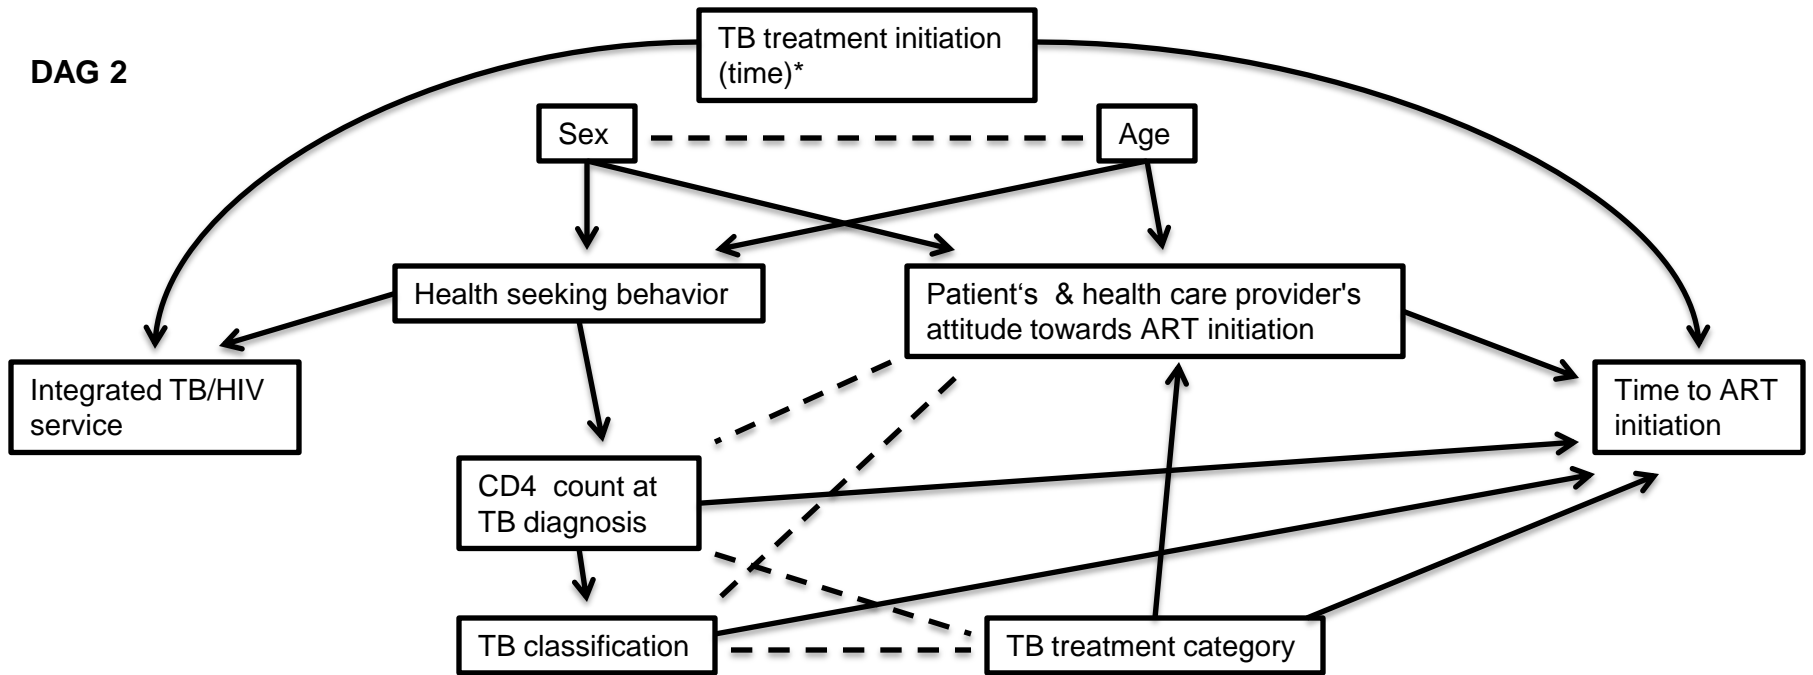

DAG 3

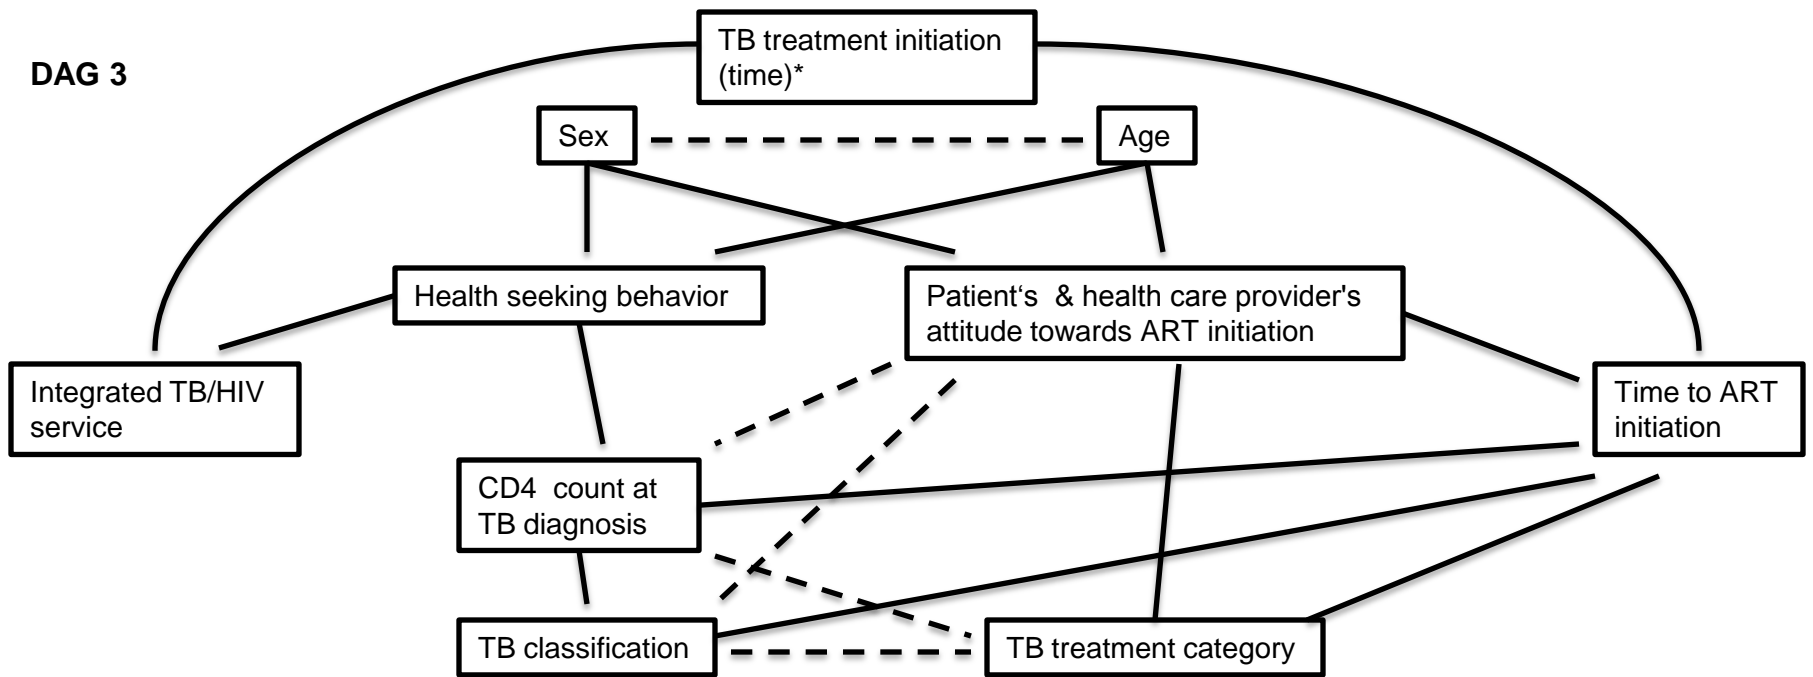

DAG 4

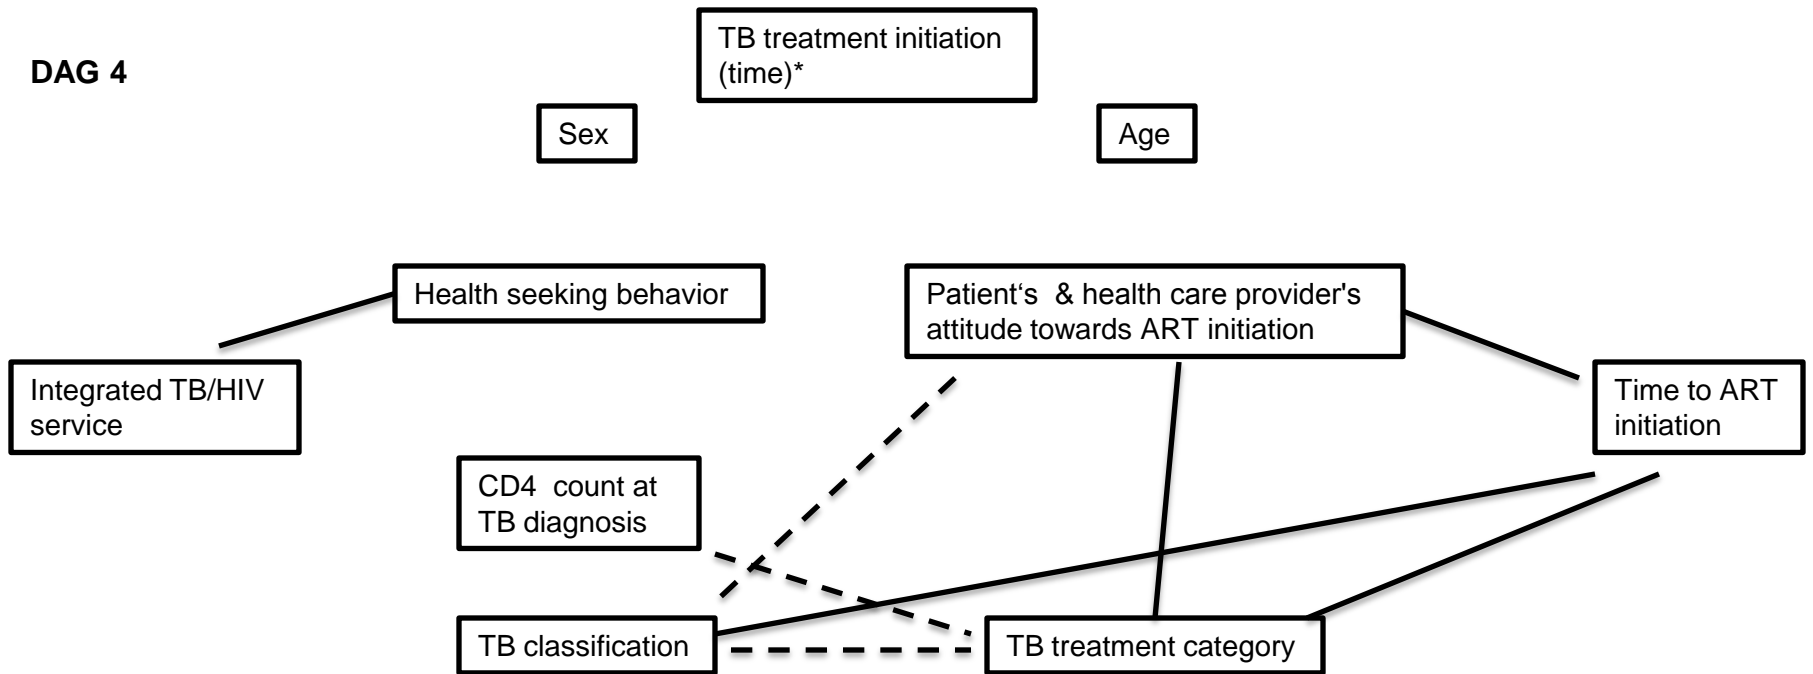

Supplement: pone.0046988.s001.pdf [file pone.0046988.s001.pdf]
